# Supplementary material for: Kinetics and mechanistic details of bulk ZnO dissolution using a thiol–imidazole system
Source: Royal Society of Chemistry journal article supplement (doi:10.1039/d1sc06667f), 2022-01-01
Supplement: d1sc06667f2.pdf [file d1sc06667f2.pdf]

*Electronic Supplementary Information*

## Kinetics and mechanistic details of bulk ZnO dissolution using a thiol-imidazole system

Kristopher M. Koskela,<sup>1</sup> Stephen J. Quiton,<sup>2</sup> Shaama Mallikarjun Sharada,<sup>1,2,\*</sup> Travis J. Williams,<sup>1,3,\*</sup> and Richard L. Brutchey<sup>1,\*</sup>

<sup>1</sup> Department of Chemistry, University of Southern California, Los Angeles, CA 90089, USA

<sup>2</sup> Mork Family Department of Chemical Engineering and Materials Science, University of Southern California, Los Angeles, CA 90089, USA

<sup>3</sup> Loker Hydrocarbon Institute, University of Southern California, Los Angeles, CA 90089, USA

\*Email: ssharada@usc.edu, travisw@usc.edu, brutchey@usc.edu

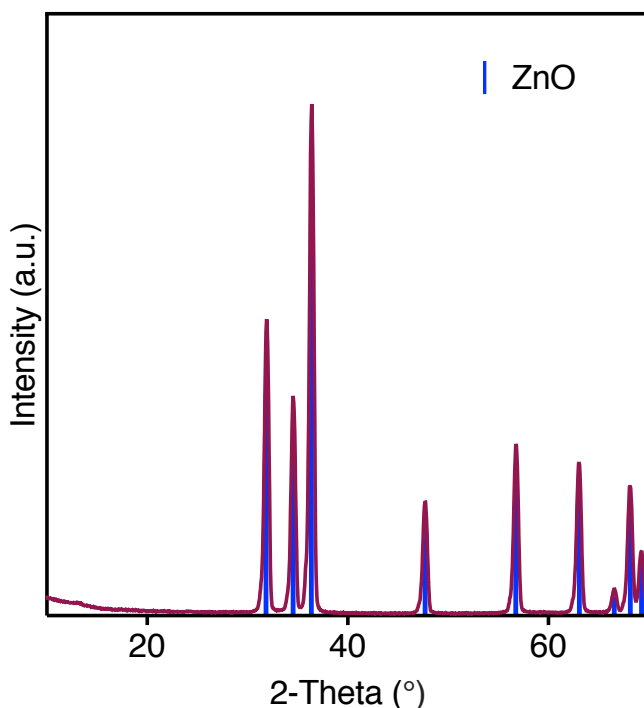

**Fig. S1** Powder XRD pattern of polycrystalline ZnO powder starting material (99.99%, Alfa Aesar) indexed to the wurtzite crystal structure.

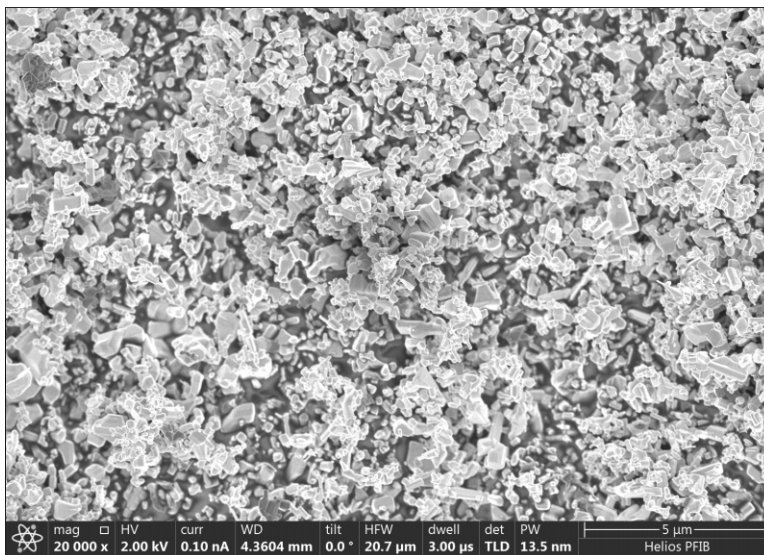

**Fig. S2** SEM micrograph of polycrystalline ZnO powder starting material (99.99%, Alfa Aesar).

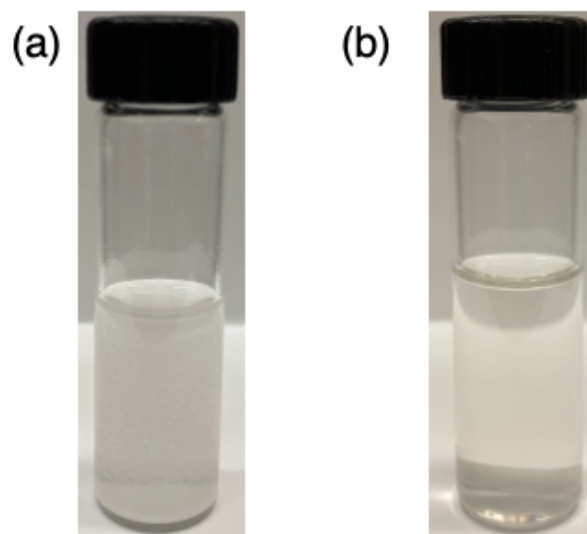

**Fig. S3** Representative photographs of synthetic polycrystalline ZnO powder dissolution in MeIm and acetonitrile (a) before thiophenol addition and (b) after thiophenol addition and full dissolution.

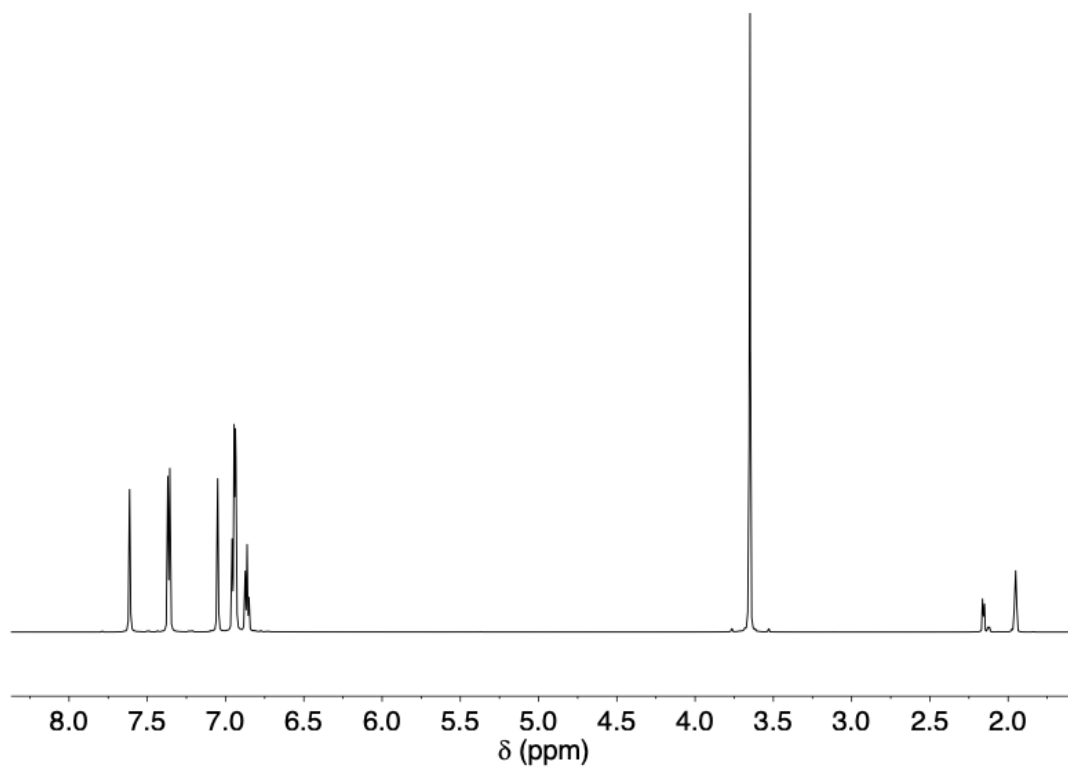

**Fig. S4** Solution  $^1\text{H}$  NMR of **4** in acetonitrile- $d_3$ .

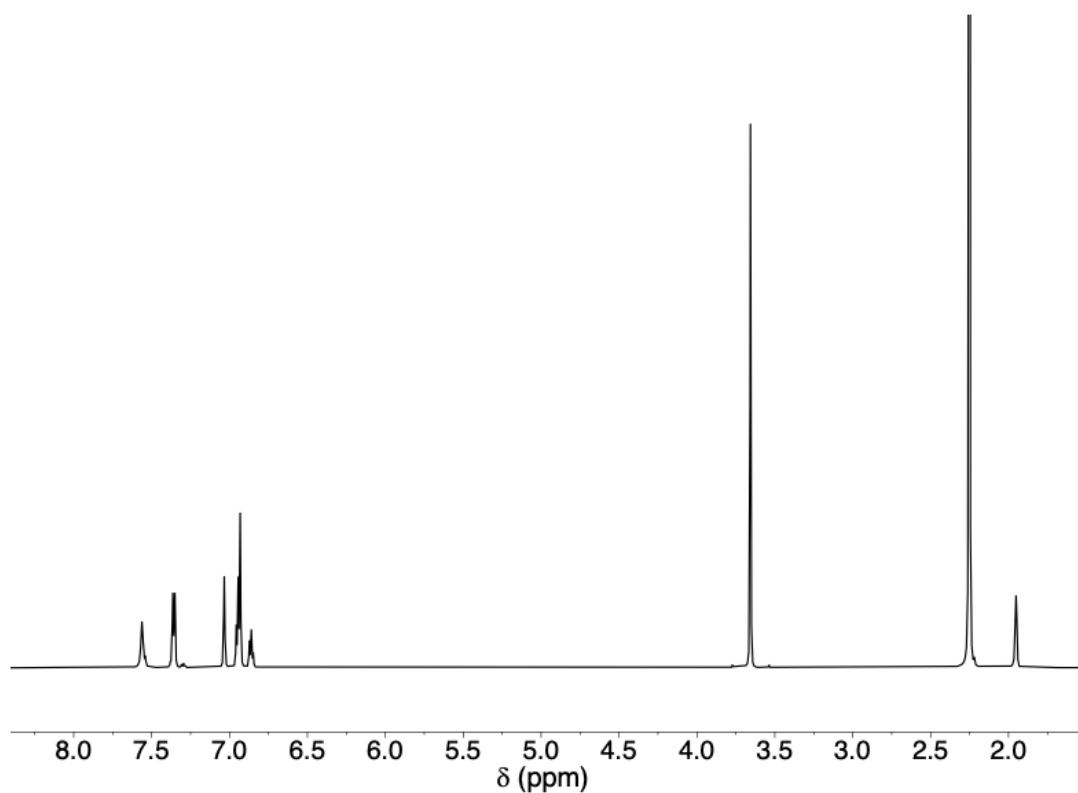

**Fig. S5** Solution  $^1\text{H}$  NMR of **4** in acetonitrile- $d_3$  after being exposed to air for 7 d (21 °C, 20-90 %RH). The peak at 2.25 ppm corresponds to  $\text{H}_2\text{O}$ .

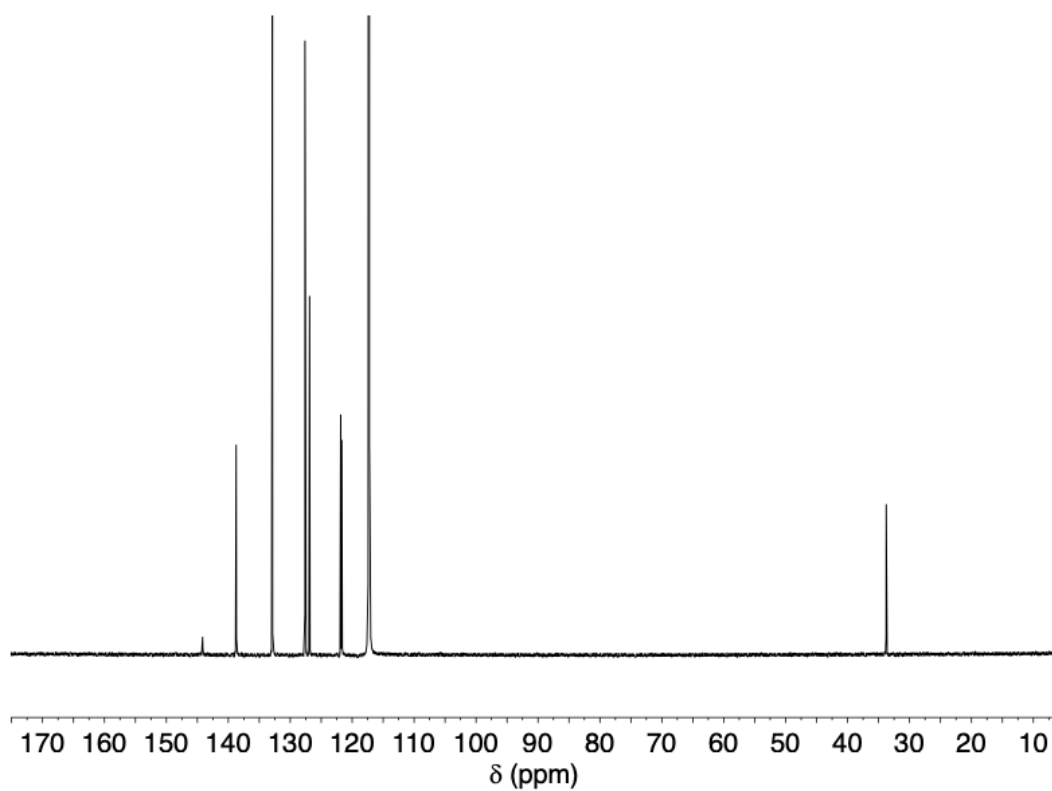

**Fig. S6** Solution  $^{13}\text{C}$  NMR of **4** in acetonitrile- $d_3$ .

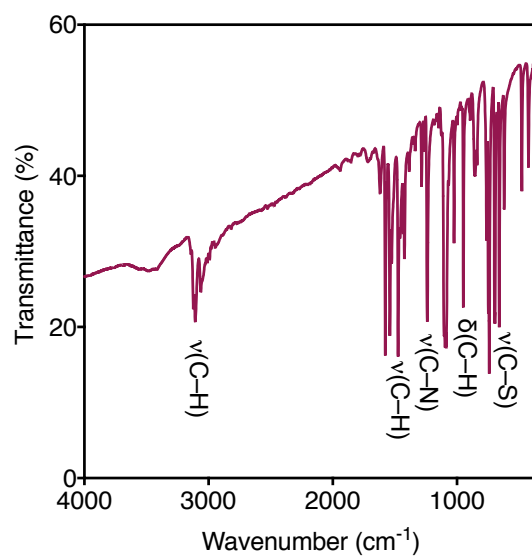

**Fig. S7** FT-IR spectrum of **4** (KBr).

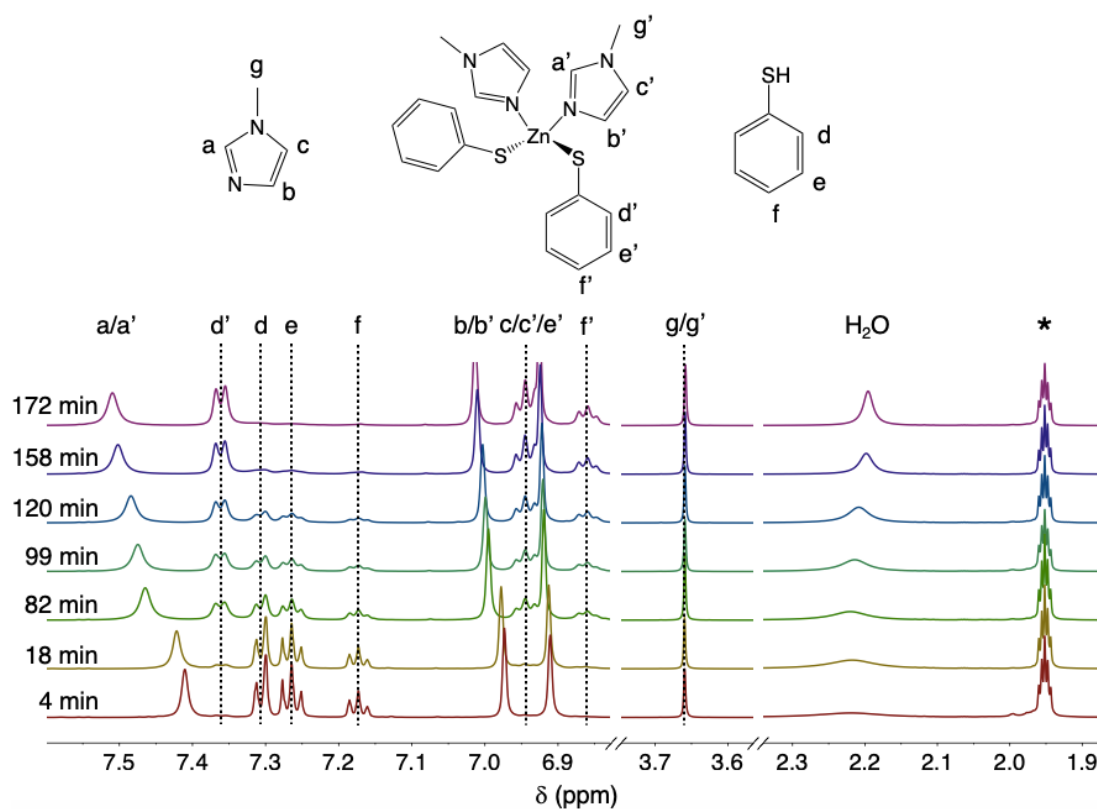

**Fig. S8** Stacked room-temperature solution  $^1\text{H}$  NMR spectra in acetonitrile- $d_3$  of the aromatic region, methyl, and  $\text{H}_2\text{O}$  peaks for aliquots taken as a function of time from the dissolution of  $\text{ZnO}$  with MeIm (3 eq) and thiophenol (2.4 eq) at  $75^\circ\text{C}$ . Acetonitrile- $d_2$  is labeled as \*.

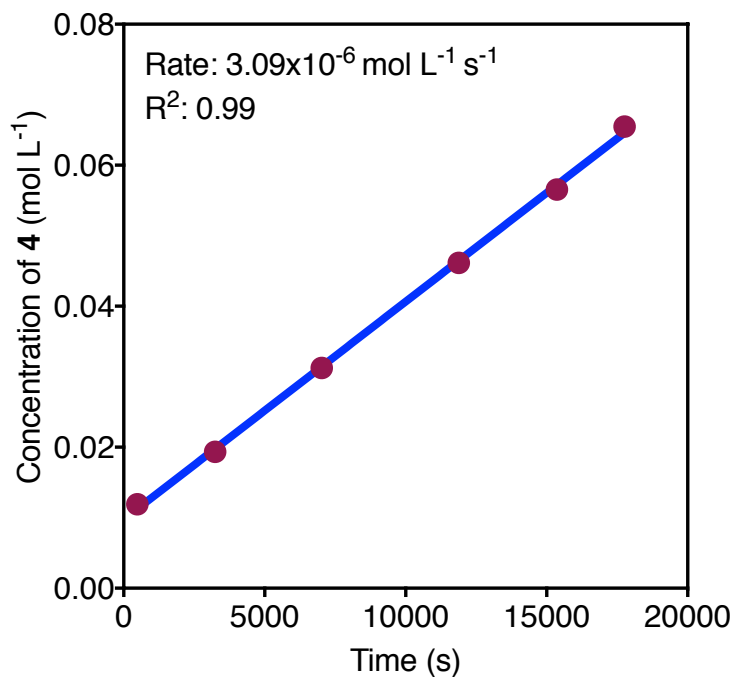

**Fig. S9** Plot of ZnO dissolution at 30 °C with concentration of **4** in solution vs. time. Dissolution was performed with 2.4 eq thiophenol and 3 equiv MeIm relative to ZnO. Zero-order dissolution kinetics are seen through completion of dissolution.

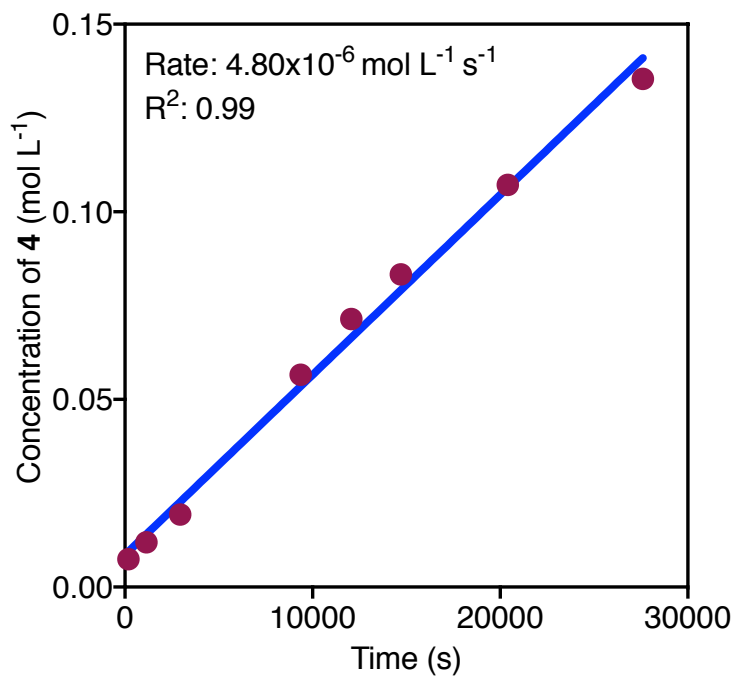

**Fig. S10** Plot of ZnO dissolution at 40 °C with concentration of **4** in solution vs. time. Dissolution was performed with 2.4 eq thiophenol and 3 equiv MeIm relative to ZnO. Zero-order dissolution kinetics are seen through completion of dissolution.

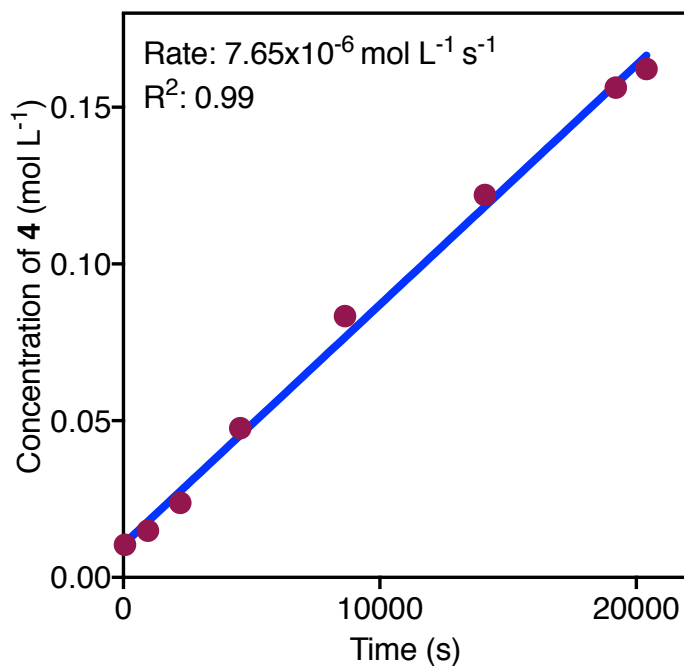

**Fig. S11** Plot of ZnO dissolution at 55 °C with concentration of **4** in solution vs. time. Dissolution was performed with 2.4 eq thiophenol and 3 equiv MeIm relative to ZnO. Zero-order dissolution kinetics are seen through completion of dissolution.

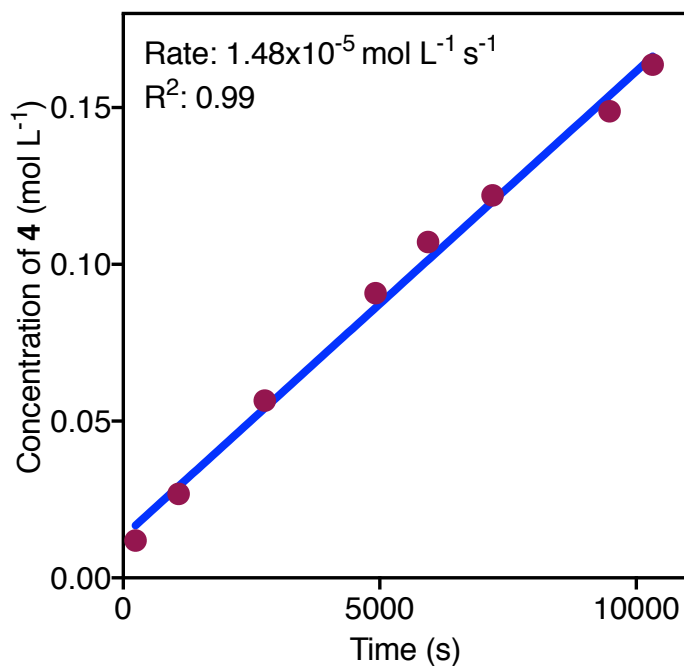

**Fig. S12** Plot of ZnO dissolution at 75 °C with concentration of **4** in solution vs. time. Dissolution was performed with 2.4 eq thiophenol and 3 equiv MeIm relative to ZnO. Zero-order dissolution kinetics are seen through completion of dissolution.

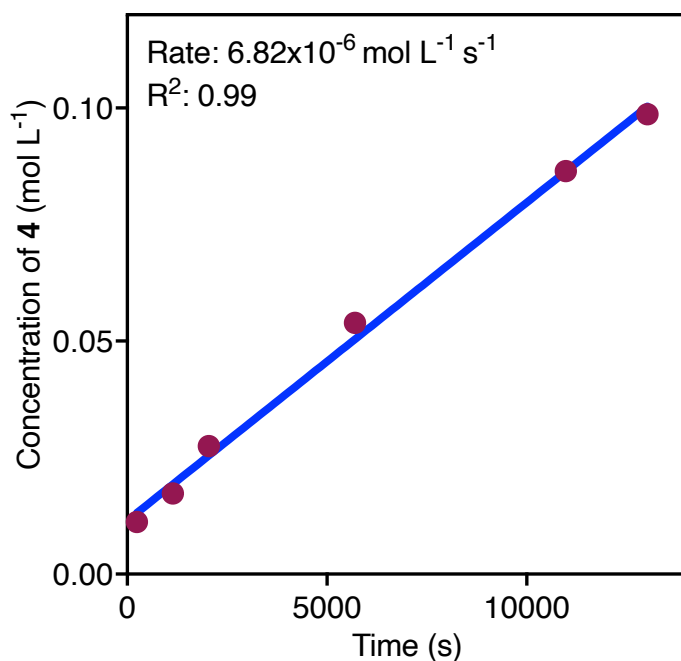

**Fig. S13** Plot of ZnO dissolution at 75 °C with concentration of **4** in solution vs. time. Dissolution was performed with stoichiometric thiophenol (2.05 eq) and MeIm (2.05 eq) relative to ZnO. Zero-order dissolution kinetics are seen through completion of dissolution.

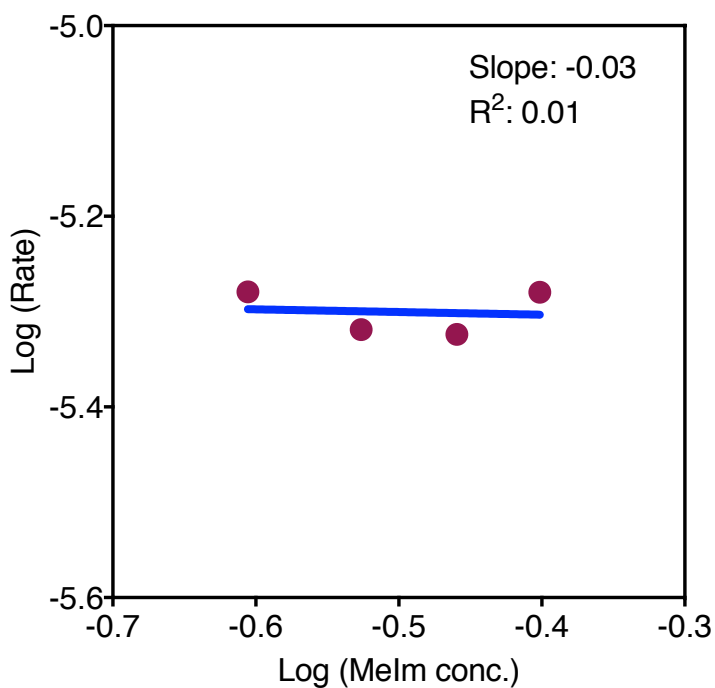

**Fig. S14** Log-log plot of rate of ZnO dissolution vs. MeIm concentration at 40 °C, where MeIm is present in excess (from 2.4-4.0 eq relative to ZnO). Zero-order dissolution kinetics are seen through completion of dissolution.

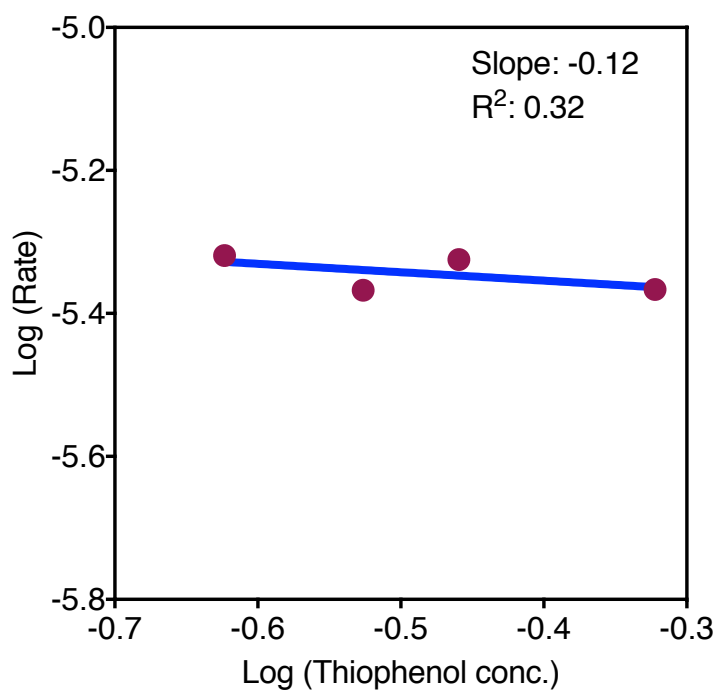

**Fig. S15** Log-log plot of rate of ZnO dissolution vs. thiophenol concentration at 40°C, where thiophenol is present in excess (from 2.4-4.8 eq relative to ZnO). Zero-order dissolution kinetics are seen through completion of dissolution.

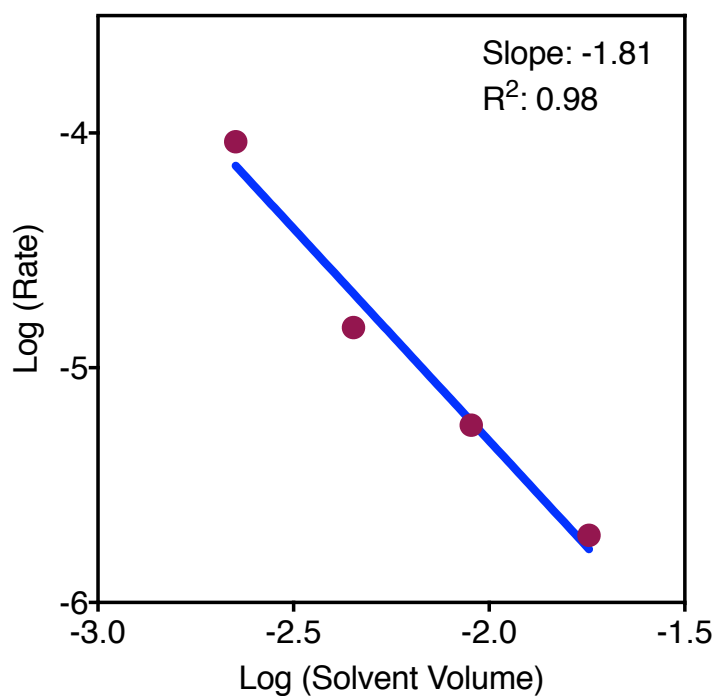

**Fig. S16** Log-log plot of solvent volume vs. rate of ZnO dissolution (75 °C).

## Rate Law and Derivation

We have observed two kinetic regimes for dissolution of ZnO under the reported conditions. In cases where ligands are abundant, rate conforms to a Michealis-Menten saturation kinetics model, where the apparent catalyst models a reactive site on the ZnO surface. In cases where ligand is scarce, the saturation model loses relevance, and we treat the system with a steady-state approximation.

Key: **Ref** = ZnO surface; **1** = binding of thiophenol (with concomitant Zn–OH formation) to ZnO; **2** = binding of MeIm to **1**, as labeled in the main text, **Fig. 4**.

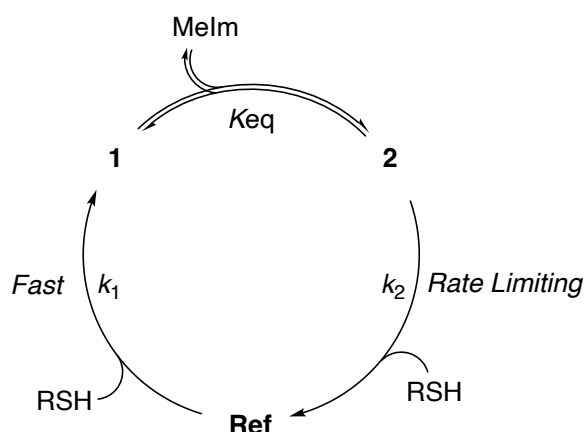

**Fig. S17** Proposed cycle for product evolution from a surface reactive site. Note that a second equivalent of MeIm enters the reaction in the conversion of **3** to **4**, but this step is kinetically invisible, so it does not enter the model.

*Derivation of the steady-state rate law.*

Rate definition: 
$$Rate = -\frac{d}{dt} [2] = k_2 [2] [RSH]$$

Equilibrium between **1** and **2**: 
$$\frac{[1]}{[2]} = \frac{1}{K_{eq} [MeIm]}$$

Steady-state approximation on [**Ref**]: 
$$k_2 [2] [RSH] = k_1 [Ref] [RSH]$$

$$\frac{[Ref]}{[2]} = \frac{k_2}{k_1}$$

Total reactive sites  $[Zn]_{tot}$ : 
$$[Zn]_{tot} = [Ref] + [1] + [2] = [2] \left[ \frac{k_2}{k_1} + \frac{1}{K_{eq} [MeIm]} + 1 \right]$$

Three-term rate law: 
$$Rate = \frac{k_2 [Zn]_{tot} [RSH]}{\left[ \frac{k_2}{k_1} + \frac{1}{K_{eq} [MeIm]} + 1 \right]}$$

Assuming that  $k_1 \gg k_2$  (i.e., conversion of **2** is rate limiting):

$$Rate = \frac{k_2[Zn]_{tot}[RSH]}{\left[\frac{1}{K_{eq}[MeIm]} + 1\right]}$$

This rate law accounts for first order dependance on thiol and partial positive dependance on methylimidazole, as observed when the reaction is diluted.

Assuming that  $K_{eq}[Im] \ll 1$  (*i.e.*, [1] is more abundant than [2]):

$$Rate = k_2[Zn]_{tot}[RSH][MeIm]$$

This assumption is not reasonable in scarce ligand conditions, which is consistent with observation of only partial order on [MeIm] in a dilution experiment.

**Table S1.** Eyring data for the dissolution of ZnO at various temperatures. Error statistics for  $\Delta H^\ddagger$  and  $\Delta S^\ddagger$  derived from the analysis performed in reference 1.

| Temperature (°C) | Rate (mol L <sup>-1</sup> s <sup>-1</sup> ) | Error in rate (mol L <sup>-1</sup> s <sup>-1</sup> ) | $R\ln(k/T) - R\ln(k_B/h)$ (J/mol•K) | $\Delta H^\ddagger$ error (J/mol•K) <sup>1</sup> | $\Delta S^\ddagger$ error (J/mol•K) <sup>1</sup> |
|------------------|---------------------------------------------|------------------------------------------------------|-------------------------------------|--------------------------------------------------|--------------------------------------------------|
| 30               | $3.09 \times 10^{-6}$                       | $4.53 \times 10^{-8}$                                | -350.54                             | 0.48                                             | 1.25                                             |
| 40               | $4.80 \times 10^{-6}$                       | $1.61 \times 10^{-7}$                                | -347.14                             | 1.01                                             | 2.86                                             |
| 55               | $7.65 \times 10^{-6}$                       | $1.99 \times 10^{-7}$                                | -343.66                             | 0.79                                             | 2.23                                             |
| 75               | $1.48 \times 10^{-6}$                       | $4.67 \times 10^{-7}$                                | -338.64                             | 0.95                                             | 2.68                                             |

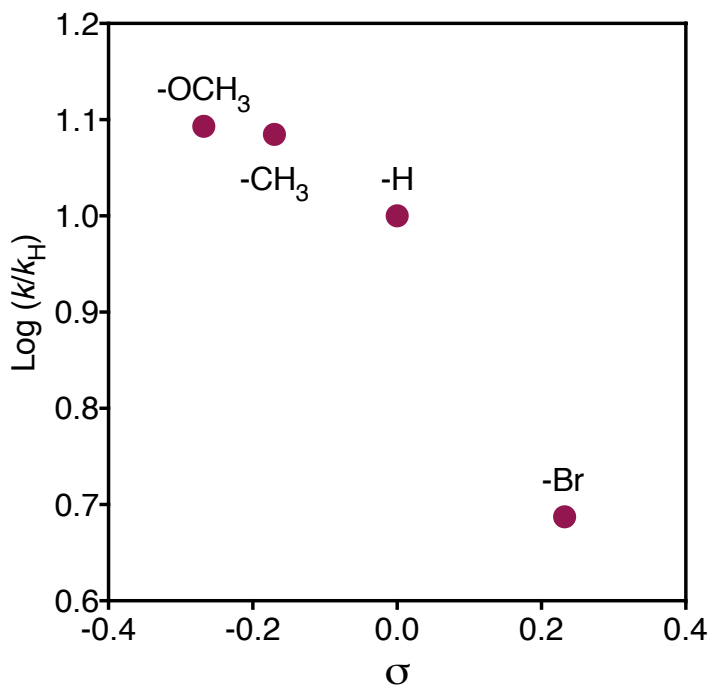

**Fig. S18** Hammett plot corresponding to ZnO dissolution reaction at 40 °C with 2.4 eq of *para*-substituted thiophenol and 3 eq of MeIm with respect to ZnO.

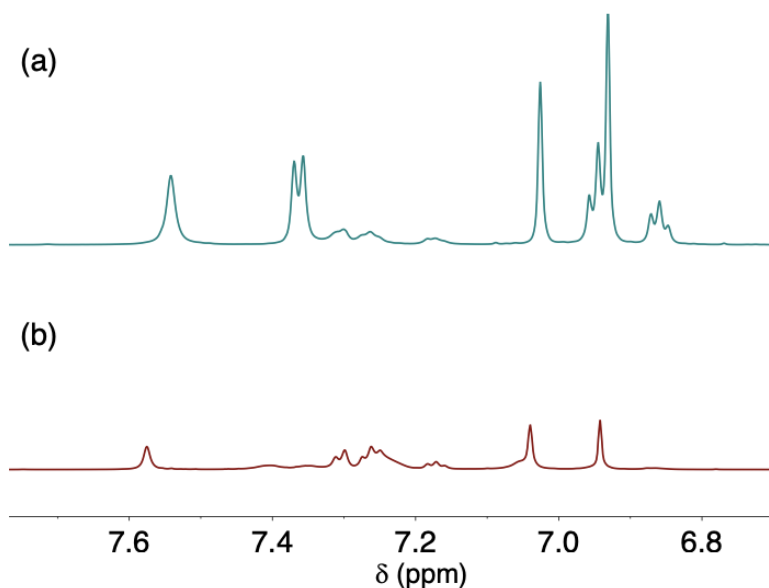

**Fig. S19** (a) Solution  $^1\text{H}$  NMR spectra of the aromatic region of a fully dissolved reaction mixture of ZnO with MeIm (3 eq) and thiophenol (2.4 eq) in acetonitrile- $d_3$ . This reaction proceeds readily to form **4**. (b) Upon addition of a more electron rich 4-bromothiophenol at 75 °C, the displacement of the thiophenolate ligands for 4-bromothiophenolate ligands with the formation of  $\text{Zn}(\text{SPhBr})_2(\text{MeIm})_2$  by the appearance of the resonances at  $\delta = 7.24$  and 7.06 ppm and the concomitant disappearance of thiophenolate protons at  $\delta = 7.36$ , 6.95 and 6.86 ppm. We see the relative intensities of free thiophenol also increase at  $\delta = 7.30$ , 7.26 and 7.17 ppm after the addition of 4-bromothiophenol.

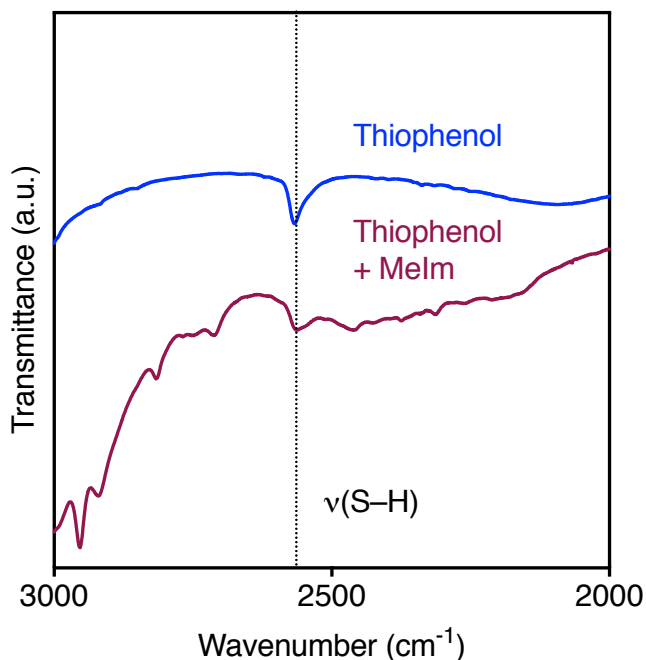

**Fig. S20** FT-IR spectra of the sulfhydryl region showing the  $\nu(\text{S-H})$  stretch of thiophenol before and after addition of MeIm in acetonitrile (NaCl plates).

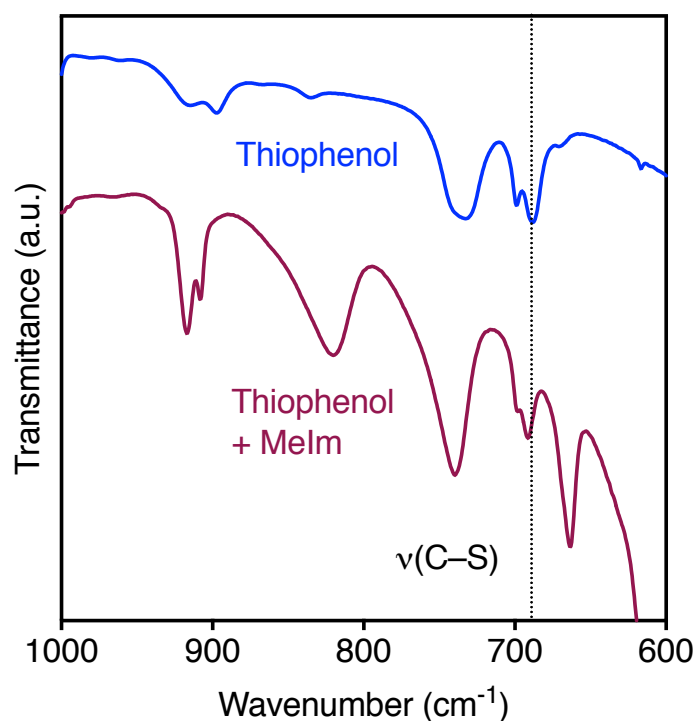

**Fig. S21** FT-IR spectra showing the  $\nu(\text{C-S})$  stretch of thiophenol before and after addition of MeIm in acetonitrile (NaCl plates).

**Table S2.** Room-temperature electrolytic conductivity measurements in acetonitrile under flowing nitrogen between two Pt wires. The measurements were run in triplicate for accuracy at 100 mV applied potential.

| Sample                      | Voltage (V) | Current (A)            |
|-----------------------------|-------------|------------------------|
| MeIm                        | 0.1         | $5.98 \times 10^{-10}$ |
| MeIm                        | 0.1         | $5.66 \times 10^{-10}$ |
| MeIm                        | 0.1         | $7.55 \times 10^{-10}$ |
| MeIm titrated w/ thiophenol | 0.1         | $6.03 \times 10^{-8}$  |
| MeIm titrated w/ thiophenol | 0.1         | $5.39 \times 10^{-8}$  |
| MeIm titrated w/ thiophenol | 0.1         | $5.23 \times 10^{-8}$  |

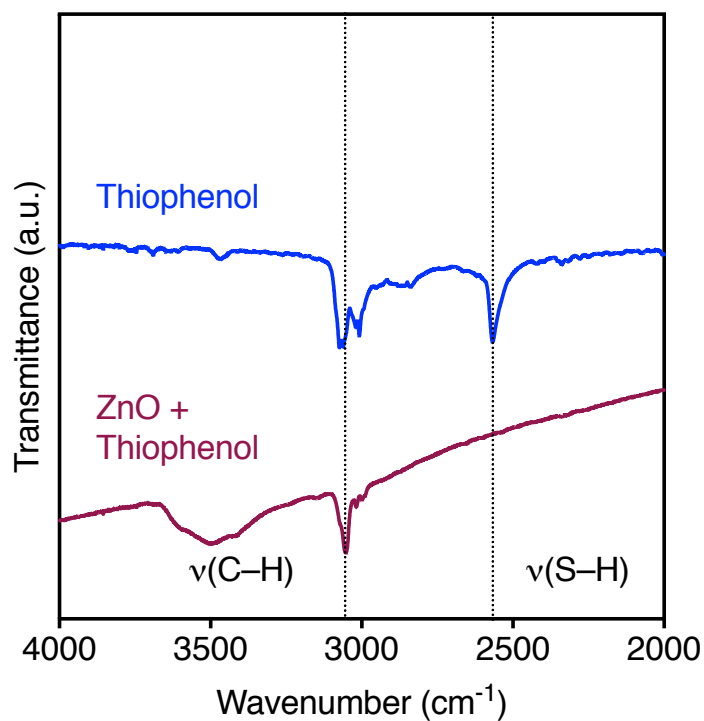

**Fig. S22** FT-IR spectra showing the  $\nu(\text{C-H})$  and  $\nu(\text{S-H})$  stretching region (KBr). ZnO was mixed with thiophenol at 75 °C, washed and dried under high vacuum overnight at room temperature.

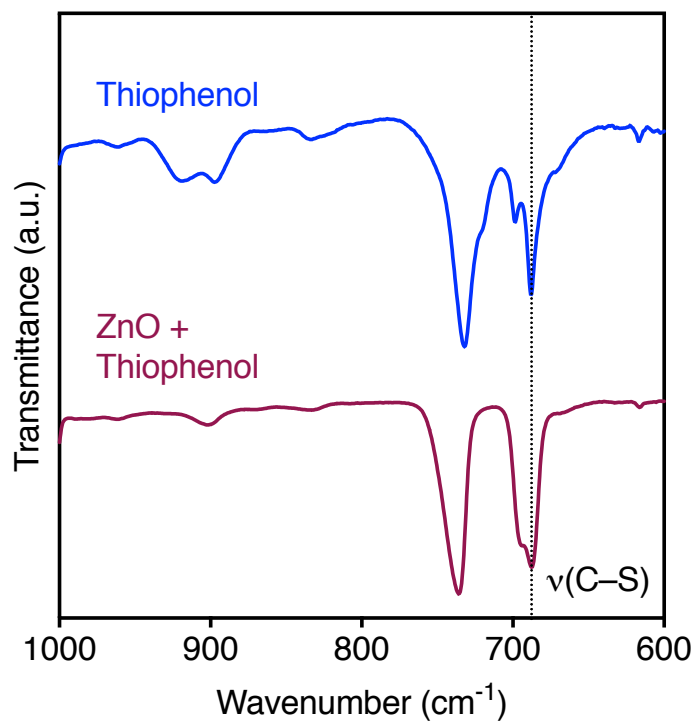

**Fig. S23** FT-IR spectra showing the  $\nu(\text{S-C})$  stretching region (KBr). ZnO was mixed with thiophenol at 75 °C, washed and dried under high vacuum overnight at room temperature.

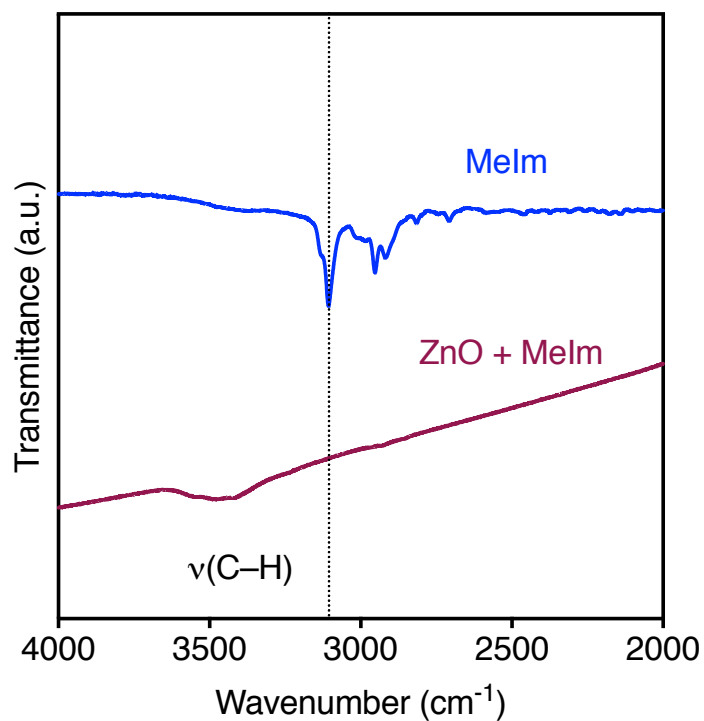

**Fig. S24** FT-IR spectra showing the  $\nu(\text{C-H})$  stretching region (KBr). ZnO was mixed with MeIm at  $75^\circ\text{C}$ , washed and dried under high vacuum overnight at room temperature.

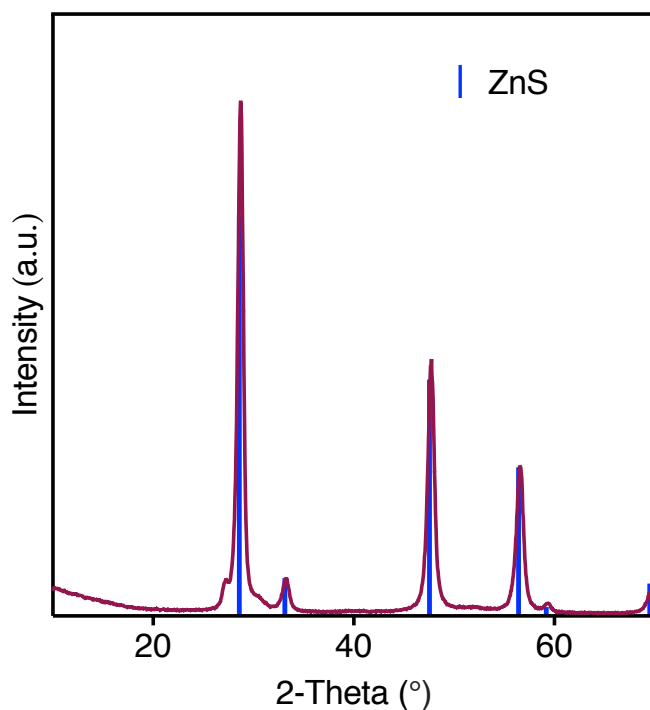

**Fig. S25** Powder XRD pattern of polycrystalline ZnS powder starting material (99.99%, Sigma-Aldrich) indexed to the sphalerite crystal structure.

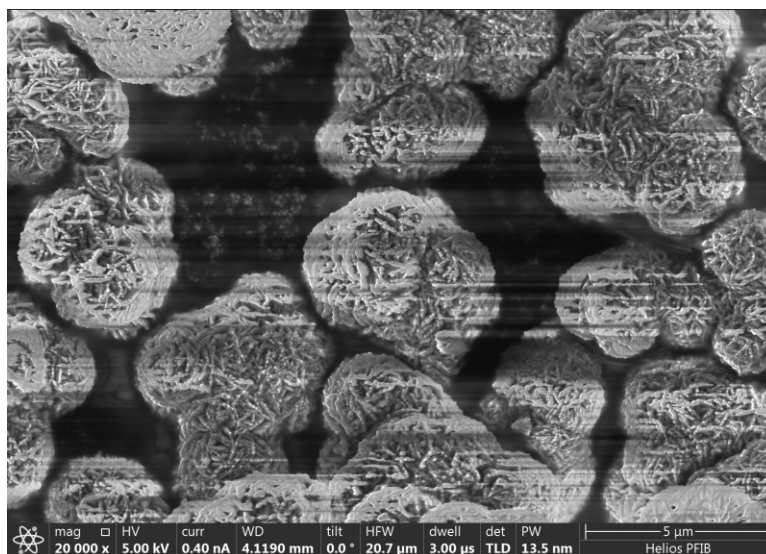

**Fig. S26** SEM micrograph of polycrystalline ZnS powder starting material (99.99%, Sigma-Aldrich).

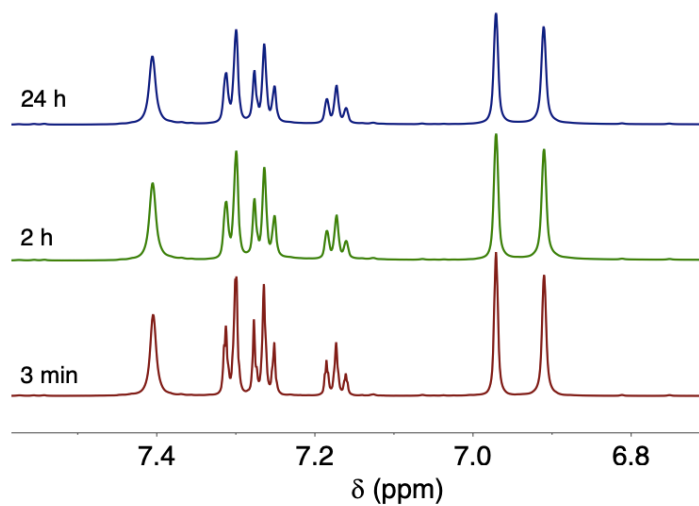

**Fig. S27**  $^1\text{H}$  NMR spectra of the aromatic region of aliquots from the reaction of ZnS with MeIm (3 eq) and thiophenol (2.4 eq) in acetonitrile- $d_3$  at 75 °C demonstrating lack of dissolution.

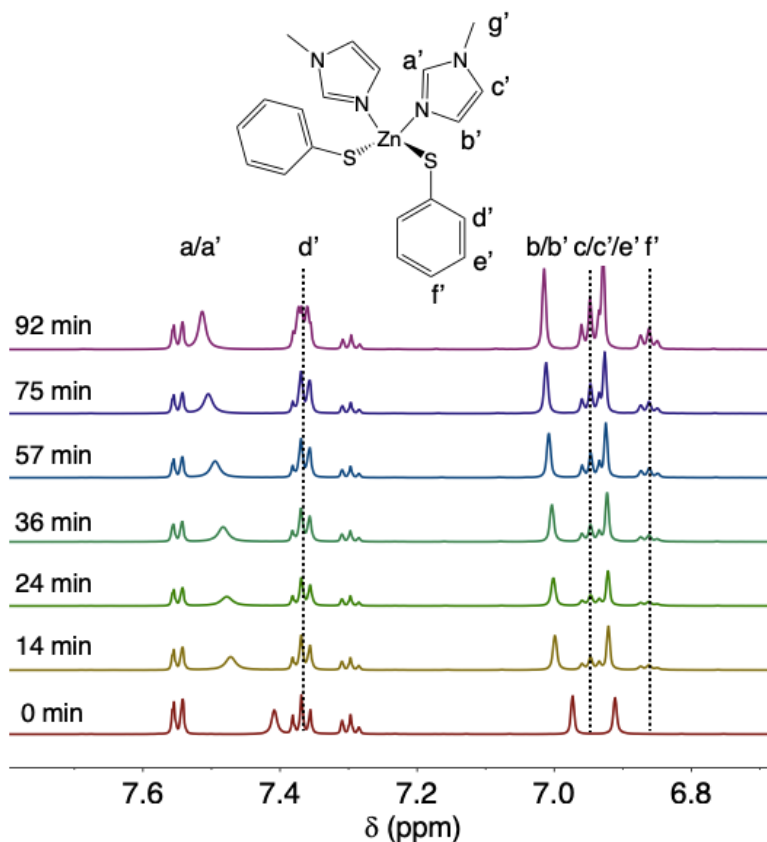

**Fig. S28** Stacked  $^1\text{H}$  NMR spectra of the aromatic region of aliquots from the dissolution of Zn metal with MeIm (3 eq) and diphenyl disulfide (2.4 eq) in acetonitrile- $d_3$  at 75 °C. This reaction readily proceeds to form **4**, as evidenced by the appearance of the bound thiophenolate protons at  $\delta = 7.36$ , 6.95, 6.86 ppm. Resonances at  $\delta = 7.56$ , 7.38 and 7.30 represent aromatic protons of diphenyl disulfide.

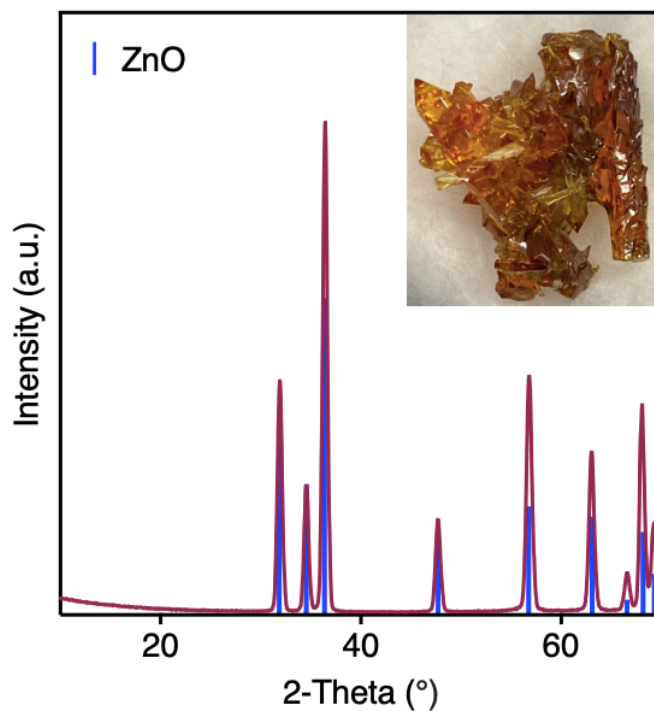

**Fig. S29** Powder XRD pattern of natural zincite mineral powder indexed to the wurtzite crystal structure. A photograph of the as-received mineral sample is shown as the inset.

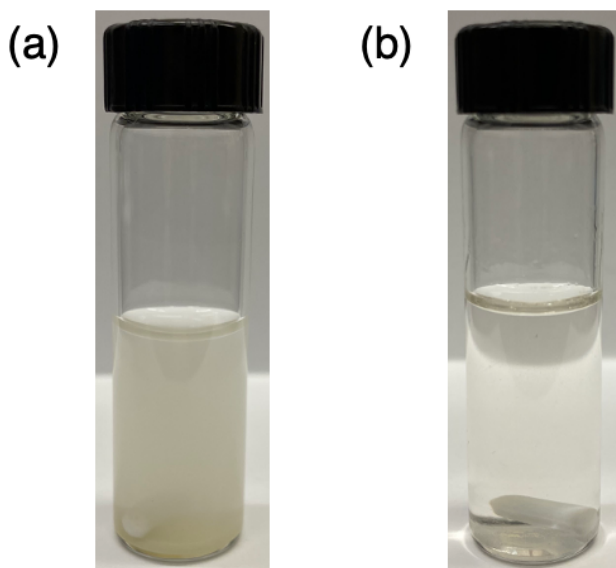

**Fig. S30** Representative photographs of natural zincite dissolution in MeIm and acetonitrile (a) before thiophenol addition and (b) after thiophenol addition and full dissolution.

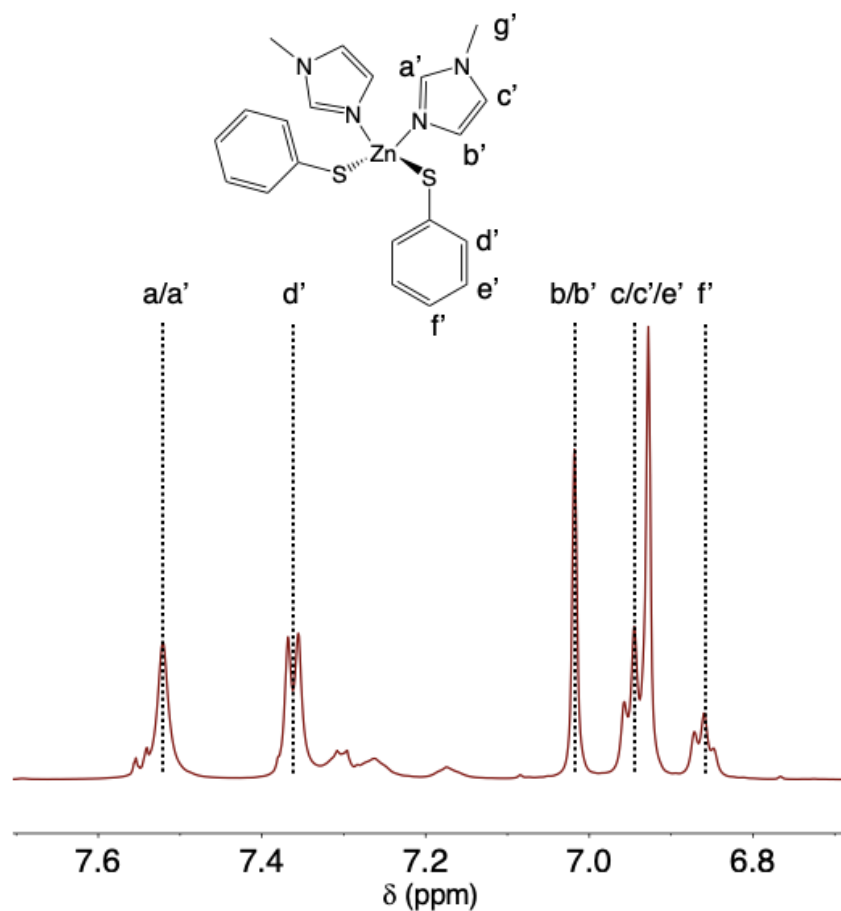

**Fig. S31**  $^1\text{H}$  NMR spectrum of the aromatic region from the dissolution of natural zincite mineral with MeIm (3 eq) and thiophenol (2.4 eq) in acetonitrile- $d_3$  at 75  $^\circ\text{C}$  after full dissolution. This reaction readily proceeds to form **4**, as evidenced by the appearance of the bound thiophenolate protons at  $\delta = 7.36, 6.95, 6.86$  ppm.

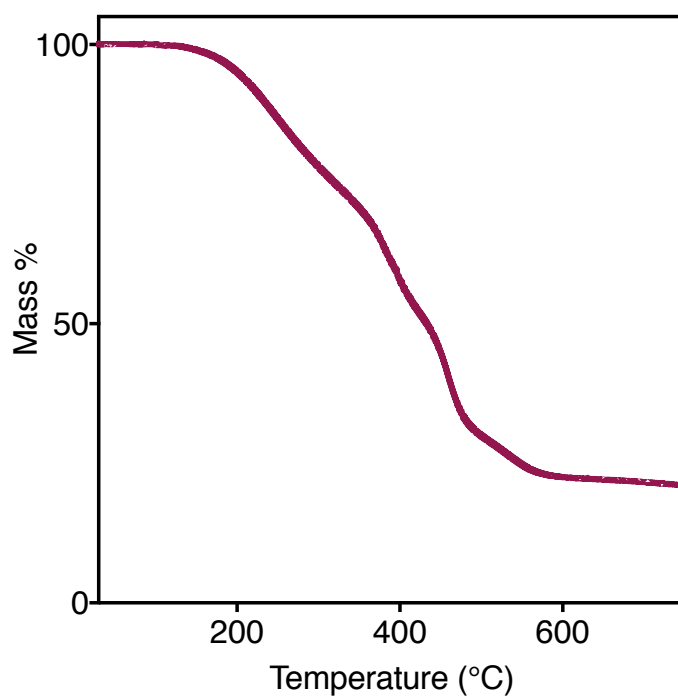

**Fig. S32** TGA trace of the thermal decomposition of **4**.

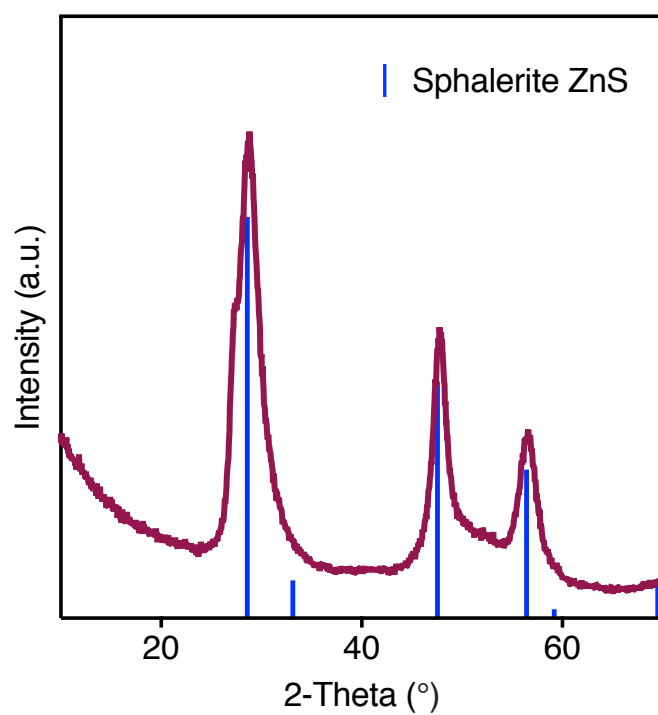

**Fig. S33** Powder XRD pattern of the thermal decomposition product of **4** annealed at 600 °C for 30 h, indexed to cubic sphalerite ZnS.

## References

1. T. J. Williams, A. D. Kershaw, V. Li and X. Wu, *J. Chem. Educ.*, 2011, **88**, 665–669.
